# Supplementary material
Source: publisher site journal article supplement (https://www.spandidos-publications.com/1489/downloadSupplementary)
Supplement: Supplementary file 1 [file downloadSupplementary]

## Sheet: Shared spots
Table SIII. List of proteins shared by both cell lines identified using 2-DE and MALDI-TOF MS, including data on normalized abundance, correlation matrix and square cosine matrix of each.
Spot id	U87MG1	U87MG2	U87MG3	T98G1	T98G2	T98G3
101	20.9	31.9	24.2	28.3	32.3	36.8
102	12.7	12.2	14.3	4.7	1.8	3.2
103	7.5	10	9.8	1.6	0.1	1.8
105	4.9	5.8	6.3	3.3	1.9	2.4
106	2.7	4.2	2.7	1.6	1.3	1.1
107	5.9	8.5	6.1	5	0.8	2.5
201	4	5.1	5.7	3.2	1.1	2.5
202	13.9	11	10.7	1.5	0.7	0.1
203	13.5	8.8	21.3	6.3	3	7.2
301	93.5	214.4	165.4	28.4	6	14.9
302	8	11.8	11.4	6.3	4	8
303	53.7	69.9	73.1	4.8	0.1	3.4
403	196.2	252	250.5	3	1.4	2
501	24.2	18.2	28.7	28.7	19.8	11.2
1001	11.6	4	9.7	16.7	15.1	16.7
1101	28.8	21.2	22.7	16.9	13.3	18.4
1102	19.3	20.1	20	1.4	1.5	2.9
1201	3.6	2.5	2.8	14	2	2
1202	17.7	12.7	14.3	1.5	4.5	3
1204	3.2	5	3.6	3	5.1	6.6
1302	6.4	18.5	15.6	6	22.3	31.7
1304	234	268.6	282.6	396	380.9	433.6
1404	98.5	113.9	115.4	3.1	0.6	2.2
1411	352.3	338.9	365.8	2.8	3.9	3.3
1502	180	223.2	227.6	4	6.6	3.4
1505	240.1	298.9	338.8	286.2	239.6	277.7
1601	294.5	174.9	119.8	853.9	464.4	399.8
1602	2.3	2.4	2.4	1.6	2.2	1
1604	11	3.8	3.4	5.1	4.7	5.3
1701	7.7	6	7.4	7.1	13.4	0.3
1702	136.4	125.1	169	86.4	280.9	146.1
1704	14	23	50.8	23.4	9.6	10.7
1706	2.3	2.4	1.1	237.7	21.9	23.8
1808	3	1.6	1.8	1.6	1.5	1.4
2001	9	8.2	9.7	37.5	30.4	34.9
2002	11	6.2	5.3	3.1	2.9	3.3
2101	2.9	3.8	3.1	3.5	2.9	3.2
2201	16.9	25.2	47.3	6.2	10.8	10
2203	347.3	400.2	553.8	231.7	207.1	267.3
2204	353.3	403.5	239.2	156.9	167.7	172.5
2205	6.5	26.4	9.7	4.9	2	10.3
2206	7.4	18.7	14.8	5	15	7.3
2402	37.5	68.9	93.8	16.2	2	16.2
2409	2.8	5	5.3	14.7	4.7	6.8
2503	9.6	19.9	26.1	14.5	10.9	11.9
2506	309.6	333.6	204.6	406.8	376.3	430.1
2508	13.2	21.1	20.9	9.2	10.1	9.1
2602	6.7	5.9	5.5	4.3	4.1	4.3
2603	203.4	180.9	202.2	127.6	111.4	118.6
2701	3	17.3	31.3	12.2	19	5
2802	16.1	16.5	25.2	3.7	3.5	3.7
2806	1.9	1.6	2.2	1.7	1.9	2.3
2807	0.8	1.3	1.9	3.3	3.6	2.8
2808	4.5	3.3	3.7	1.2	6	0.7
2809	5.9	7.3	7	21.3	15.9	8
3001	4.4	4.5	4.1	3.5	1.7	4.4
3003	3.7	3.5	4	0.8	0.3	1
3004	10	3.8	1.3	5.6	2.3	3.8
3005	4.9	4.3	5.1	1.3	0.7	1.1
3101	9.4	11.3	11.1	17.3	19.7	16.8
3102	28.7	34.8	35.3	57.8	57.7	32.4
3104	45	68	59.9	9.1	6.1	6.9
3105	155.5	204.8	190.4	14.2	23.4	20.1
3106	27.4	20.7	17.8	110.9	95.7	111.8
3108	8.2	6.3	6	9.7	9.9	7.8
3205	7.3	15.2	11.6	5.6	9.7	9.8
3302	15.8	23.9	22.4	116	113	109.7
3303	2.5	3	1.8	2.9	4.8	2.6
3306	7	8.8	8.6	1.5	8.4	8.4
3503	18.5	24.3	30.9	7.9	8.4	8.4
3505	4.9	5.6	5.7	3.8	5	4.5
3506	13	14.2	16	1.9	2.1	2.4
3507	6.8	9.6	9.2	5.2	6.4	5.4
3509	3.6	2.8	3	14	13.7	10.3
3601	159.8	149.8	165.9	9.5	7.5	9.1
3602	12.3	18.4	18.2	47.7	40	50
3604	4.9	4.8	5.1	21.8	22.3	23.2
3605	389.9	397.4	415	476	422.9	431.6
3607	4.1	4	4	2.9	3.2	3.3
3609	18	1.4	1.3	2.6	1.4	1.3
3610	1.9	2.9	1.8	3	4.2	7.3
3611	7.8	6.5	6.3	17.9	17.6	13.1
3703	4.8	6	5.7	22.4	17.6	23.4
3704	2.8	3.4	3.9	5	5.4	6.9
3705	1	1.1	1.1	6.5	3.9	5.9
3706	5.7	3.2	2	4	7.7	12.4
3801	5.8	11.8	12.1	24.8	19.3	21
3803	3	4.3	5.8	4.2	8	3.5
3901	7.9	2.1	1.9	2.8	2.8	3.7
4004	3	3.7	0.6	2	2.3	2.5
4101	13.8	14.5	13.4	2	1.5	1.7
4102	3.6	4.5	5.5	16.7	15.5	15
4103	14.2	28.8	19.6	3.7	6	4.3
4104	9.2	18	16.8	8	17.7	28.6
4105	9.5	5.4	5.8	3.9	4.2	3.7
4106	4.9	6.1	5	9.5	11.4	13.6
4203	5.7	5.6	5.9	3.1	2.8	2.2
4204	6.7	6.5	7.2	5.8	7.5	3.3
4301	1.9	2.5	1.9	1	5	1.1
4302	4.1	4.7	4.7	2.2	3.4	2.8
4303	32.2	43.5	35.6	7	5	5.7
4304	3.2	3.7	2.3	2.7	3.3	5.3
4306	6.2	6.6	7.4	4.9	4.7	4.8
4308	3.3	3.8	5.1	3.4	5	4.4
4405	28.4	36	36.2	6.7	6.1	7.4
4406	99.1	125.5	113.7	39.2	32.2	41
4502	121.3	152.9	134.7	246.4	224	229
4503	13	14	10.8	3.9	4	3.3
4504	7.4	7.4	7.3	7.5	8.4	8
4601	21.7	26.2	27.9	72	72.9	68.3
4602	7.4	8.4	5.7	2.2	3.2	3.1
4701	6.3	2.7	2	26	2	2.5
4702	11.7	15.5	8.5	0.5	5.1	1.9
4703	1	1.4	1.6	3	2.7	1.4
4704	3.7	3.7	4.6	2	4.4	3.2
4705	24.3	24.2	25.4	4.5	3.4	2.5
4805	9.8	16.1	13.3	0.5	5	5.7
4806	13.8	20.3	17.5	1.6	2	7
4810	2.7	7.5	8.3	2.2	3.6	5.5
5001	9.5	15.1	13.9	8.5	8.5	8.2
5003	3.1	3.4	4	2.4	0.3	2.7
5004	6.6	3.7	5.5	3.9	0.2	5.3
5005	8.4	7.8	8.2	3.6	2.6	4.2
5006	9.2	9.5	9.7	2.7	1.1	3
5102	16.4	17.4	17.4	5	4.5	4.1
5104	8.7	9.1	9.3	11.4	9.8	11.1
5105	12.6	6.1	9.4	12.8	9.4	13.3
5201	11.1	13.3	13	16.8	13.5	16.6
5301	7.4	6.2	9.7	21.4	21.2	27.4
5302	31.7	22.5	19.6	12.6	15.8	17.7
5303	4.3	5.1	2.6	3	2.4	2.7
5304	2.3	2.4	2.6	2.8	2.8	3.2
5305	4.2	7.7	18	15.8	21.4	5.7
5306	10.2	10.2	9.6	5.6	4.8	6.4
5309	6.6	6.7	7.2	1.5	1.2	2.7
5401	1.3	1.3	1.7	1.8	1.4	1.1
5403	310.9	345.1	338.3	143.6	141.6	152
5406	44.4	4	16.4	2.7	1.5	2.6
5407	1.6	2.4	2	1.3	1	1.1
5408	9.6	11.3	16.9	5.7	4.8	4.8
5501	9.4	10.9	12.1	1.7	2.1	1.8
5505	2.6	2.4	8	1.3	1.6	1.7
5605	40.9	34.8	46.1	9.7	9.2	9.5
5701	7	4	3.2	4.4	2	0.7
5702	24.7	25.8	27.3	11	2.7	3.7
5704	4.7	4.4	4.9	1.7	0.9	1.4
5705	1.4	1.8	3.1	2.8	2.9	2.6
5709	9	2.7	3.3	4.7	2.2	5
5806	1.3	4.3	9.6	3	2.2	2.7
5808	30.4	37.2	29.8	2.3	3.1	3
5810	2.8	3	2.1	0.7	1.6	0.9
5811	2.1	2.3	5	1.7	1.3	1.9
6004	6.4	6.9	7.3	5	5	4.6
6006	3.3	4.1	5	1	0.5	0.9
6302	11.3	13.5	13.1	11.5	11.8	18.9
6303	6.6	5.1	7.1	3.1	3.1	3.3
6401	3.3	1.4	3.3	2.5	2.7	3
6403	8.9	9.5	9.6	15.7	8.8	10.4
6404	1.7	2.4	1.5	3.6	4	4.5
6405	2	0.3	6	4.6	6.9	4.7
6501	13.2	18.5	17.5	11.6	11.6	9.6
6504	7.8	7	6.7	5.7	5.6	8.1
6506	6.3	5.3	6.7	1.7	3.2	1.9
6507	11.9	11.8	6.2	2.6	4.3	2.7
6508	4.5	5.1	5.3	1.3	1.4	1
6601	1.8	1.5	1.8	8.7	8	8.8
6603	19.2	11.9	24.2	37.2	30.9	39.7
6606	2	4	6	1.5	2.7	0.1
6608	1.4	1.5	1.4	7	8.4	6.9
6701	7.8	6.5	6.4	2.4	2.5	1
6802	10.8	9.3	13.6	1.3	1.2	1.3
7006	4.8	5.5	8	8.7	9.5	8.1
7013	6.5	7.2	7.5	29.1	27.3	32.8
7101	15.6	15.8	17.8	4.5	4.6	4.4
7102	8.5	8.4	10.4	4	1.1	2.7
7103	166.9	198.9	187.2	8.6	10.5	9.3
7104	10.5	11.8	11	4.8	5	4.4
7201	11.1	11.5	12	5.6	3.5	5.1
7203	75.8	85.6	76.7	124.6	69.4	100
7302	15.2	8.6	7.9	12.2	14.5	11.5
7401	4.4	4.5	5.8	5.6	6.8	6.5
7403	7.2	6.8	9.1	27.4	35.4	35.3
7404	4.4	5.6	15.3	17.4	14.8	20.1
7406	8.7	24	6.5	1.4	4	4.7
7501	2.1	14	2	1.8	2.4	2.2
7502	5	6.1	5.1	4.1	4.3	3.4
7503	18.2	18.1	21.7	7.2	8.4	8.5
7504	24.9	21.5	32	11.6	12.3	5.3
7505	19.8	18.3	35.7	7.6	8	8.1
7507	2.7	3.7	3.6	2.2	1.9	1.1
7509	9.2	12.7	43	5.4	6.5	10
7603	6.3	7	12.6	48.1	60.1	61.1
7604	15.2	17.2	10.6	2.8	2.3	2.5
7606	4.9	2.8	1.9	0.7	2	1.1
7701	8.6	8.8	8.7	4.8	5.3	6.3
7704	2.7	2.9	2.8	1.9	3.8	5
7707	4.1	4.4	6.4	1.8	10	3
7803	6.2	7.5	8	2.1	2	2.7
8003	27.5	34.8	31.6	39.9	34.5	26.8
8004	20.6	21.3	22.8	12.1	8.7	10.1
8005	111.5	108.6	120	9.6	8.5	8.4
8008	22.1	22.5	24.8	3.8	3.2	3.1
8011	2.9	1.7	1	1.8	4.8	6.5
8012	38.8	25.5	39.2	12.8	21.2	74.5
8103	28.4	28.1	23.6	25.5	20.5	21.8
8104	29.1	32	34.8	7.4	4.8	7.6
8105	17.1	21.5	17.9	5	3	4
8107	9.9	0.6	11.1	8	0.7	14.6
8108	16.5	17	17.1	20.2	18.9	18.7
8109	5.7	12.4	9.3	9.2	9.2	8.6
8110	20.2	17.1	21.3	26.5	27.6	26.9
8112	2.3	4	3.2	1	0.2	1.3
8201	1.5	3.7	2.6	19.8	5	26.2
8203	6.2	6.2	6	13.2	15.6	18.9
8205	4.7	5.8	4.5	1.6	0.1	1
8301	43.7	58.9	37.1	7.1	9.1	11.5
8302	4.2	3.1	4.2	9.9	7.4	8
8303	537.3	627	535	208.5	201.1	227.3
8401	82.6	89.8	100.8	30.3	27	45.7
8403	158.5	157.9	173.1	216.7	208.3	218.6
8405	54.7	57	62.8	9.1	8.8	9.3
8406	19.1	15.4	18.5	5.2	1.7	3.5
8501	3.5	3	6.8	4.9	5.2	8.3
8502	21.8	19.3	21	7.2	3.8	5.8
8506	4.2	5.7	4.2	10.8	11.6	11.1
8511	11.9	12.2	21.1	11.4	5.9	5.2
8601	2	2.2	2.5	1.4	2	1.8
8703	9.7	7.7	12.1	3.5	5.4	11
8707	19.6	20.5	24.3	22.4	33.5	41.3
8801	107.6	137.8	157.4	16.4	23.8	26.6
8802	1	2.5	2.6	1.6	2.2	1.6
8804	1.1	2.3	0.3	2.4	2.3	2.1
9101	105.8	83.8	87.5	68	44.2	112
9102	3199	385.3	254.2	1132	15.7	515.8
9404	127.1	25.1	7.1	6.3	89.7	161.1
9505	1384.4	171.5	64	5.7	116.5	111.9

## Sheet: Correlation matrix
Spot id	PC1	PC2	PC3	PC4	PC5
101	-0.618049	-0.339636	0.47794	0.0292258	-0.522859
102	0.978902	0.0230673	-0.0879048	-0.168012	0.0725433
103	0.980565	-0.0939153	0.0189744	-0.142452	-0.0949733
105	0.949734	-0.135008	-0.156788	-0.231696	-0.038903
106	0.885221	-0.0592517	-0.108615	0.0910688	-0.439071
107	0.818781	0.0503278	-0.271649	-0.288048	-0.412673
201	0.874871	-0.162289	-0.135643	-0.426492	-0.089269
202	0.970239	0.222493	-0.0637635	0.0404815	0.0585487
203	0.763419	-0.146963	0.0134766	-0.406676	0.47961
301	0.913266	-0.265041	-0.0359969	-0.0625737	-0.300812
302	0.810385	-0.256478	0.181533	-0.417445	-0.265103
303	0.989884	-0.118365	-0.00899306	-0.0716154	-0.0301482
403	0.994611	-0.0936213	0.00344143	-0.0204511	-0.0394163
501	0.309329	-0.0623161	-0.838315	-0.137422	0.422819
1001	-0.872638	0.216198	-0.0249806	-0.177218	0.399662
1101	0.795544	0.528957	0.0873714	-0.220474	0.176272
1102	0.997842	0.0311572	0.0544537	-0.0193717	0.000978517
1201	-0.352556	0.181206	-0.814312	-0.406086	-0.121899
1202	0.947215	0.204784	0.0740059	0.132142	0.194704
1204	-0.368554	-0.234686	0.829362	0.102577	-0.332757
1302	-0.345863	-0.406739	0.829808	0.0555991	-0.152542
1304	-0.947163	-0.19758	0.135163	-0.203782	-0.0636294
1404	0.998821	-0.0408126	0.000602128	-0.0232523	-0.0122044
1411	0.997557	0.0381769	0.00480161	-0.00513915	0.0580812
1502	0.995655	-0.0904919	0.00357671	-0.0122615	-0.0178612
1505	0.40135	-0.666778	-0.0938998	-0.618271	-0.0570034
1601	-0.786882	0.234013	-0.54586	-0.142256	-0.0886261
1602	0.745537	-0.171825	-0.323263	0.541682	0.129357
1604	0.151012	0.942222	0.029018	0.122278	0.271328
1701	0.0125993	-0.164779	-0.509323	0.779371	0.325363
1702	-0.224991	-0.366558	0.280947	0.749963	0.416699
1704	0.555007	-0.577866	-0.292249	-0.436284	0.286853
1706	-0.538006	0.0997912	-0.730911	-0.376466	-0.156948
1808	0.539999	0.741599	-0.105546	0.109271	0.367902
2001	-0.984674	-0.0164696	-0.0681159	-0.157125	-0.0286076
2002	0.743764	0.645911	0.0319005	0.109692	0.1287
2101	0.133667	-0.225773	-0.239155	-0.309601	-0.882106
2201	0.773515	-0.532265	0.0583215	-0.168476	0.294249
2203	0.857024	-0.364417	0.0695767	-0.293696	0.20399
2204	0.854496	0.272196	0.0788397	0.197712	-0.387866
2205	0.561867	-0.203493	0.229785	-0.101439	-0.761449
2206	0.4836	-0.650356	0.151053	0.512159	-0.240923
2402	0.875312	-0.39375	-0.00950128	-0.279288	0.0264193
2409	-0.555371	-0.0749662	-0.606018	-0.518619	-0.222978
2503	0.567808	-0.730819	-0.14639	-0.349256	-0.00936619
2506	-0.829342	0.30821	0.110503	0.0131162	-0.452565
2508	0.888532	-0.434363	-0.000488825	-0.0184534	-0.146628
2602	0.908698	0.415074	0.0126358	0.0423796	0.00515703
2603	0.968547	0.128718	-0.0692644	-0.117457	0.163569
2701	0.313231	-0.8873	-0.238725	0.0774957	0.227134
2802	0.94383	-0.205212	-0.0108216	-0.132007	0.222554
2806	-0.137451	-0.164606	0.653938	-0.375468	0.620806
2807	-0.907006	-0.376498	-0.153874	0.061273	0.0903254
2808	0.319648	-0.0757941	-0.0695666	0.869182	0.362992
2809	-0.722111	-0.110272	-0.676174	0.0735149	-0.0614844
3001	0.571378	0.291221	0.26576	-0.665487	-0.274255
3003	0.985071	0.0491246	0.037281	-0.146615	0.0658546
3004	0.153997	0.973053	-0.169585	-0.0201535	-0.0169804
3005	0.984266	0.0741998	-0.031601	-0.107338	0.114869
3101	-0.948906	-0.250804	-0.0409888	0.18558	-0.0235618
3102	-0.669842	-0.286388	-0.614264	0.303225	0.00531315
3104	0.977096	-0.145213	-0.0145016	-0.0257019	-0.152728
3105	0.991495	-0.0996364	0.0289807	0.0183312	-0.0763801
3106	-0.992349	0.046992	-0.00024377	-0.104551	-0.0458664
3108	-0.788565	0.33569	-0.363035	0.338703	0.137708
3205	0.5226	-0.563908	0.416706	0.193493	-0.444763
3302	-0.993188	-0.0966984	-0.0452903	-0.0120107	-0.0450625
3303	-0.543647	-0.0912211	-0.0691831	0.818504	-0.146256
3306	0.401383	-0.307766	0.779169	0.364462	0.065072
3503	0.932689	-0.32762	0.00953961	-0.113585	0.0988097
3505	0.765966	-0.45327	0.317897	0.322326	0.0537507
3506	0.99432	-0.0763211	0.024654	-0.0422883	0.0557349
3507	0.859606	-0.463956	0.0430546	0.139459	-0.156588
3509	-0.96889	-0.0329852	-0.222329	0.0998737	0.0275654
3601	0.996098	0.0442149	0.00142532	-0.0182997	0.0741381
3602	-0.963245	-0.118523	0.0350196	-0.209887	-0.113283
3604	-0.997559	-0.0534567	0.0391164	-0.0201477	-0.00912516
3605	-0.749841	-0.161436	-0.476758	-0.428251	-0.0313057
3607	0.95695	0.0920808	0.254023	0.0792493	0.0704196
3609	0.369526	0.869244	-0.0555792	0.134211	0.294557
3610	-0.702986	-0.0294701	0.665188	-0.13893	-0.207763
3611	-0.946386	0.00910765	-0.283556	0.151673	0.0293576
3703	-0.970474	-0.0285124	0.0277789	-0.216896	-0.0977299
3704	-0.866302	-0.233683	0.386575	-0.213143	-0.00662402
3705	-0.938562	0.0283805	-0.0841177	-0.314269	-0.111602
3706	-0.656455	0.273737	0.702603	0.0146788	0.0163748
3801	-0.894707	-0.291557	-0.179264	-0.233871	-0.166322
3803	-0.234747	-0.678416	-0.128485	0.612048	0.305836
3901	0.159334	0.92952	0.132595	0.104755	0.286444
4004	0.0697388	0.52037	0.202986	0.375412	-0.736352
4101	0.99732	0.0618952	-0.00531376	0.0067305	-0.0380605
4102	-0.984784	-0.133221	-0.0962446	-0.0559158	-0.00798843
4103	0.900604	-0.234745	0.0394824	0.107911	-0.347279
4104	-0.236547	-0.377415	0.875505	-0.106535	-0.154092
4105	0.712451	0.61216	-0.024578	0.162448	0.301133
4106	-0.92458	-0.0830874	0.354227	-0.0110884	-0.112466
4203	0.983744	0.0186472	-0.16467	0.0223812	0.0654366
4204	0.461022	-0.229732	-0.515714	0.619801	0.290805
4301	-0.0944275	-0.302571	0.0382373	0.940474	0.116537
4302	0.914242	-0.239175	0.192599	0.261695	0.0371146
4303	0.983963	-0.0470871	-0.0104578	0.00369475	-0.171687
4304	-0.375916	0.211993	0.804339	-0.0994867	-0.39609
4306	0.950771	-0.237902	-0.0353635	-0.155311	0.118592
4308	-0.111743	-0.781147	0.37643	0.195617	0.44425
4405	0.99036	-0.119592	0.0199109	-0.0475373	-0.0472054
4406	0.985593	-0.0734412	0.0230688	-0.0567982	-0.139478
4502	-0.963344	-0.134844	-0.102853	-0.0809385	-0.191458
4503	0.973204	0.136589	-0.0205816	0.111503	-0.146151
4504	-0.755372	-0.130419	0.366689	0.518646	0.0946046
4601	-0.988879	-0.137512	-0.0536013	0.00973761	-0.0155284
4602	0.926071	0.159203	0.136268	0.197334	-0.244003
4701	-0.378635	0.265012	-0.787736	-0.383961	-0.135835
4702	0.886944	0.0615418	0.10482	0.356257	-0.26765
4703	-0.686136	-0.317697	-0.635016	0.157528	0.0150176
4704	0.475502	-0.412303	0.398604	0.512132	0.427481
4705	0.997574	0.0288563	-0.0498574	-0.00675029	0.0384871
4805	0.899582	-0.237881	0.298605	0.10842	-0.182331
4806	0.946078	-0.114145	0.223232	-0.0989328	-0.179687
4810	0.552833	-0.686084	0.403996	-0.201334	-0.141126
5001	0.823793	-0.483078	-0.0210445	-0.0370493	-0.293571
5003	0.735238	0.00928331	0.0632365	-0.670456	-0.0763484
5004	0.502188	0.45012	0.180685	-0.696035	0.167594
5005	0.972789	0.135685	0.0743081	-0.168924	0.0348338
5006	0.986248	0.0540836	0.0272377	-0.152241	-0.0217068
5102	0.999371	0.00258344	-0.0351801	-0.00221944	-0.00279173
5104	-0.84657	-0.0821452	-0.0996863	-0.494685	-0.148057
5105	-0.516308	0.588187	0.0303116	-0.461884	0.41618
5201	-0.76095	-0.199062	-0.0378662	-0.536077	-0.304167
5301	-0.95847	-0.0703269	0.199008	-0.181123	0.0630801
5302	0.726427	0.603105	0.256721	0.17851	0.103906
5303	0.64219	0.404319	-0.0450412	0.134536	-0.635601
5304	-0.831636	-0.247598	0.369631	-0.329387	0.0442039
5305	-0.302663	-0.681587	-0.466092	0.285922	0.380579
5306	0.970084	0.156269	0.110674	-0.126143	-0.079723
5309	0.98131	0.0218164	0.136657	-0.130748	0.0280014
5401	0.0201668	-0.34942	-0.858504	-0.245169	0.283483
5403	0.997412	-0.0404101	0.0327143	-0.0249535	-0.0429273
5406	0.587854	0.663143	-0.00815602	0.0318077	0.462158
5407	0.889399	-0.228685	-0.100454	-0.105279	-0.368099
5408	0.877817	-0.362751	-0.0753376	-0.205304	0.223659
5501	0.99163	-0.120201	0.0082909	-0.0201135	0.0418213
5505	0.625407	-0.505839	0.0153024	-0.27987	0.523862
5605	0.97683	0.00628146	-0.00843145	-0.0661948	0.203253
5701	0.569516	0.623871	-0.528267	0.0713473	0.0477434
5702	0.968176	0.0256433	-0.199678	-0.148071	-0.0134342
5704	0.984885	0.0713449	-0.0508592	-0.136078	0.0617044
5705	-0.506693	-0.738811	-0.129768	-0.200531	0.374657
5709	0.180167	0.91598	0.0343615	-0.235857	0.26779
5806	0.483721	-0.743792	-0.0620319	-0.374261	0.262427
5808	0.989406	0.0208978	0.0271638	0.0524053	-0.130975
5810	0.890369	0.129786	0.0912216	0.403772	-0.138006
5811	0.641057	-0.497245	0.0142566	-0.410657	0.415874
6004	0.971294	-0.20349	-0.110534	-0.00489428	0.0541988
6006	0.967135	-0.188976	-0.0201406	-0.161879	0.0482531
6302	-0.26581	-0.134641	0.811877	-0.456912	-0.208094
6303	0.924802	0.0529501	0.0221361	-0.110084	0.359625
6401	-0.0783672	0.228799	0.177484	-0.227181	0.926498
6403	-0.472089	0.0559919	-0.649279	-0.554452	-0.212173
6404	-0.940627	-0.0545418	0.23186	0.0351715	-0.23927
6405	-0.569373	-0.465339	-0.0266608	0.0313607	0.676446
6501	0.867708	-0.414492	-0.167836	0.0521535	-0.210689
6504	0.345618	0.463287	0.733339	-0.354033	-0.0528087
6506	0.946416	-0.0211583	0.0265801	0.163353	0.27651
6507	0.850257	0.343937	0.0372629	0.316922	-0.238627
6508	0.995371	-0.0837097	-0.0411383	0.0189837	0.0133126
6601	-0.996284	-0.0240568	2.80732e-05	-0.0822641	-0.00852848
6603	-0.893587	-0.0371371	0.045832	-0.360899	0.260336
6606	0.711244	-0.624652	-0.224482	0.130578	0.19105
6608	-0.98516	-0.0946903	-0.0135274	0.141847	0.0138181
6701	0.95599	0.189287	-0.14957	0.143155	0.0859634
6802	0.970443	-0.0520893	-0.00695846	-0.0855525	0.219452
7006	-0.761926	-0.562008	-0.128388	-0.0101841	0.295006
7013	-0.987511	-0.0478984	0.0852127	-0.115984	-0.0425883
7101	0.995292	-0.0392329	-0.00378972	-0.0274688	0.0841737
7102	0.95443	-0.0176927	-0.115259	-0.263608	0.0773139
7103	0.998169	-0.0329799	0.0103872	0.00928549	-0.0487536
7104	0.995313	-0.0279554	-0.0256403	0.0555157	-0.0695016
7201	0.982305	0.0287243	-0.0396964	-0.180157	-0.0147841
7203	-0.48973	0.131986	-0.382626	-0.6711	-0.382055
7302	-0.442816	0.701986	-0.0663948	0.470446	0.292236
7401	-0.756595	-0.480792	0.261004	0.0562895	0.353711
7403	-0.975183	-0.111834	0.17005	0.0641397	0.0589889
7404	-0.747249	-0.424478	0.0986229	-0.435113	0.249774
7406	0.66889	-0.0729179	0.168555	0.217529	-0.686687
7501	0.462047	-0.190146	0.0693071	0.214093	-0.836491
7502	0.867903	-0.137306	-0.210309	0.283735	-0.32118
7503	0.979792	-0.0981165	0.0613642	-0.0409463	0.15792
7504	0.910802	-0.140748	-0.21166	0.0216268	0.324594
7505	0.843853	-0.312968	-0.00782321	-0.196273	0.389074
7507	0.887794	-0.285032	-0.337098	0.0522562	-0.11922
7509	0.577011	-0.586635	0.0677643	-0.333021	0.455437
7603	-0.978533	-0.133796	0.144813	0.0271143	0.0535412
7604	0.943744	0.198567	0.00849818	0.104547	-0.242726
7606	0.671536	0.588008	0.103831	0.421359	0.12232
7701	0.96271	0.0351263	0.264254	-0.044928	-0.0103185
7704	-0.392419	-0.104025	0.909948	0.0820247	0.0212634
7707	0.0155639	-0.46416	0.128432	0.780058	0.399159
7803	0.98292	-0.140318	0.0697387	-0.095977	-0.0101777
8003	-0.241156	-0.359378	-0.827427	0.0961851	-0.344681
8004	0.98231	-0.00962447	-0.0997537	-0.157377	0.016028
8005	0.997396	0.0182549	-0.00372573	-0.0185326	0.0671579
8008	0.997648	-0.0130211	-0.0178572	-0.0302232	0.0574162
8011	-0.662485	0.20159	0.702393	0.158732	0.0438566
8012	-0.053615	0.13291	0.881098	-0.422903	0.155822
8103	0.673928	0.513713	-0.33359	-0.117217	-0.396104
8104	0.993735	-0.0514936	0.00627173	-0.0972191	0.0186836
8105	0.985704	-0.00205218	-0.0256573	-0.0261657	-0.164437
8107	-0.0709575	0.258635	0.326853	-0.78756	0.448318
8108	-0.910699	-0.14029	-0.341055	-0.160086	-0.0948674
8109	0.0821841	-0.705102	-0.0663916	0.0520224	-0.699259
8110	-0.947617	-0.0713247	0.00790242	-0.0256731	0.310183
8112	0.907962	-0.151364	0.077496	-0.217185	-0.315465
8201	-0.749799	0.0819214	0.182699	-0.59143	-0.218909
8203	-0.948117	-0.0357897	0.312967	-0.0389709	-0.0180635
8205	0.962983	0.0810532	-0.0678124	-0.117179	-0.218552
8301	0.945077	0.0645362	0.0867633	0.0960092	-0.293118
8302	-0.941039	0.0471569	-0.238652	-0.227232	0.0602689
8303	0.987364	0.0216279	0.0436632	0.0135189	-0.150186
8401	0.969339	-0.0819257	0.149373	-0.172445	0.0402498
8403	-0.968623	-0.143903	0.00413743	-0.188718	0.0736837
8405	0.997542	-0.0312836	0.00473196	-0.0315358	0.0539861
8406	0.971165	0.141569	-0.0688479	-0.126862	0.126343
8501	-0.4549	-0.35886	0.498769	-0.500165	0.406633
8502	0.981826	0.131579	-0.0509607	-0.108481	0.0658826
8506	-0.980328	-0.103452	0.0276296	0.0832239	-0.143408
8511	0.742091	-0.3281	-0.366591	-0.34182	0.300701
8601	0.754164	-0.458949	0.334565	0.217246	0.247935
8703	0.522235	-0.0603349	0.689719	-0.346535	0.357536
8707	-0.690758	-0.210229	0.68023	-0.0272541	0.123294
8801	0.977578	-0.194266	0.0510578	-0.0531853	0.0341408
8802	0.255222	-0.940527	-0.000580492	0.155586	-0.161443
8804	-0.654317	0.0785746	-0.075329	0.24803	-0.706046
9101	0.3665	0.45083	0.550668	-0.599312	-0.00442174
9102	0.288811	0.920754	-0.160812	-0.0600522	0.198328
9404	-0.306538	0.55526	0.742518	0.140735	0.163038
9505	0.429291	0.837457	0.0730508	0.20993	0.254887

## Sheet: Square cosines matrix
Spot id	PC1	PC2	PC3	PC4	PC5
101	0.381984	0.115353	0.228427	0.000854145	0.273382
102	0.95825	0.000532102	0.00772726	0.0282281	0.00526253
103	0.961507	0.00882009	0.000360029	0.0202926	0.00901993
105	0.901994	0.0182273	0.0245824	0.053683	0.00151344
106	0.783616	0.00351077	0.0117971	0.00829352	0.192783
107	0.670403	0.00253289	0.0737933	0.0829717	0.170299
201	0.765399	0.0263376	0.018399	0.181895	0.00796896
202	0.941365	0.0495029	0.00406578	0.00163875	0.00342795
203	0.582809	0.0215981	0.000181618	0.165385	0.230026
301	0.834054	0.0702467	0.00129578	0.00391547	0.090488
302	0.656724	0.0657809	0.0329543	0.174261	0.0702796
303	0.979871	0.0140103	8.08751e-05	0.00512877	0.000908912
403	0.989251	0.00876495	1.18434e-05	0.000418247	0.00155364
501	0.0956847	0.00388329	0.702771	0.0188847	0.178776
1001	0.761498	0.0467416	0.000624033	0.0314064	0.15973
1101	0.63289	0.279796	0.00763375	0.0486088	0.0310719
1102	0.995688	0.000970771	0.00296521	0.000375263	9.57496e-07
1201	0.124296	0.0328355	0.663103	0.164906	0.0148594
1202	0.897216	0.0419363	0.00547687	0.0174614	0.0379096
1204	0.135832	0.0550773	0.687841	0.010522	0.110728
1302	0.119621	0.165437	0.688582	0.00309126	0.023269
1304	0.897117	0.0390377	0.0182689	0.0415272	0.0040487
1404	0.997644	0.00166567	3.62558e-07	0.000540668	0.000148946
1411	0.99512	0.00145748	2.30554e-05	2.64109e-05	0.00337343
1502	0.991329	0.00818878	1.27929e-05	0.000150345	0.000319024
1505	0.161082	0.444593	0.00881718	0.382259	0.00324939
1601	0.619184	0.0547619	0.297963	0.0202367	0.00785458
1602	0.555825	0.0295237	0.104499	0.293419	0.0167333
1604	0.0228045	0.887782	0.000842042	0.014952	0.073619
1701	0.000158743	0.0271523	0.259409	0.607419	0.105861
1702	0.0506209	0.134365	0.0789312	0.562445	0.173638
1704	0.308033	0.333929	0.0854093	0.190344	0.0822844
1706	0.289451	0.00995829	0.534231	0.141727	0.0246327
1808	0.291599	0.549969	0.01114	0.0119403	0.135352
2001	0.969582	0.000271248	0.00463978	0.0246882	0.000818396
2002	0.553185	0.417201	0.00101764	0.0120324	0.0165638
2101	0.017867	0.0509734	0.0571953	0.0958531	0.778111
2201	0.598325	0.283306	0.00340139	0.0283842	0.0865825
2203	0.73449	0.132799	0.00484091	0.0862574	0.0416118
2204	0.730163	0.0740905	0.0062157	0.0390902	0.15044
2205	0.315695	0.0414094	0.0528012	0.0102899	0.579805
2206	0.233869	0.422963	0.022817	0.262307	0.0580439
2402	0.766171	0.155039	9.02743e-05	0.078002	0.000697979
2409	0.308437	0.00561993	0.367258	0.268966	0.049719
2503	0.322406	0.534097	0.0214301	0.12198	8.77256e-05
2506	0.687809	0.0949932	0.012211	0.000172035	0.204815
2508	0.789488	0.188671	2.3895e-07	0.000340527	0.0214998
2602	0.825731	0.172286	0.000159663	0.00179603	2.65949e-05
2603	0.938083	0.0165683	0.00479756	0.0137961	0.0267547
2701	0.0981135	0.787301	0.0569895	0.00600558	0.05159
2802	0.890815	0.0421118	0.000117107	0.0174259	0.0495303
2806	0.0188927	0.0270952	0.427635	0.140976	0.385401
2807	0.822659	0.141751	0.0236773	0.00375439	0.00815868
2808	0.102175	0.00574475	0.00483951	0.755477	0.131763
2809	0.521444	0.0121598	0.457211	0.00540444	0.00378033
3001	0.326473	0.0848097	0.0706284	0.442873	0.0752158
3003	0.970364	0.00241322	0.00138988	0.0214959	0.00433683
3004	0.023715	0.946831	0.0287591	0.000406165	0.000288336
3005	0.968779	0.00550561	0.000998624	0.0115215	0.0131948
3101	0.900422	0.0629028	0.00168008	0.0344398	0.00055516
3102	0.448688	0.0820182	0.37732	0.0919455	2.82296e-05
3104	0.954716	0.0210867	0.000210295	0.000660589	0.023326
3105	0.983063	0.00992742	0.00083988	0.000336034	0.00583392
3106	0.984757	0.00220825	5.94236e-08	0.0109309	0.00210373
3108	0.621834	0.112688	0.131794	0.11472	0.0189636
3205	0.273111	0.317992	0.173644	0.0374395	0.197814
3302	0.986423	0.00935058	0.00205121	0.000144257	0.00203063
3303	0.295552	0.00832129	0.0047863	0.66995	0.0213907
3306	0.161109	0.0947201	0.607104	0.132832	0.00423437
3503	0.869909	0.107335	9.10041e-05	0.0129016	0.00976336
3505	0.586705	0.205454	0.101059	0.103894	0.00288914
3506	0.988673	0.00582491	0.000607817	0.0017883	0.00310637
3507	0.738922	0.215256	0.0018537	0.019449	0.0245198
3509	0.938747	0.00108802	0.04943	0.00997475	0.00075985
3601	0.992212	0.00195496	2.03155e-06	0.000334878	0.00549645
3602	0.92784	0.0140477	0.00122637	0.0440526	0.012833
3604	0.995123	0.00285762	0.00153009	0.000405931	8.32686e-05
3605	0.562262	0.0260616	0.227298	0.183399	0.000980048
3607	0.915754	0.00847888	0.0645277	0.00628044	0.00495892
3609	0.136549	0.755585	0.00308905	0.0180126	0.0867639
3610	0.494189	0.000868488	0.442475	0.0193014	0.0431656
3611	0.895647	8.29492e-05	0.0804038	0.0230048	0.000861869
3703	0.94182	0.000812959	0.000771668	0.0470437	0.00955114
3704	0.750478	0.0546076	0.14944	0.04543	4.38777e-05
3705	0.880899	0.000805453	0.00707578	0.0987649	0.012455
3706	0.430933	0.0749322	0.493651	0.000215467	0.000268133
3801	0.8005	0.0850057	0.0321355	0.0546957	0.0276629
3803	0.0551059	0.460248	0.0165085	0.374602	0.0935354
3901	0.0253874	0.864008	0.0175814	0.0109735	0.08205
4004	0.0048635	0.270785	0.0412034	0.140934	0.542214
4101	0.994647	0.00383102	2.8236e-05	4.52996e-05	0.0014486
4102	0.969799	0.0177479	0.00926302	0.00312658	6.38151e-05
4103	0.811088	0.0551051	0.00155886	0.0116449	0.120603
4104	0.0559543	0.142442	0.76651	0.0113496	0.0237445
4105	0.507586	0.374739	0.000604076	0.0263894	0.0906812
4106	0.854848	0.00690351	0.125477	0.000122953	0.0126485
4203	0.967753	0.000347718	0.0271162	0.000500916	0.00428195
4204	0.212542	0.0527766	0.265961	0.384153	0.0845678
4301	0.00891655	0.0915489	0.00146209	0.884492	0.0135808
4302	0.835839	0.0572047	0.0370945	0.0684842	0.0013775
4303	0.968183	0.0022172	0.000109365	1.36512e-05	0.0294765
4304	0.141313	0.0449411	0.646961	0.00989761	0.156887
4306	0.903966	0.0565973	0.00125058	0.0241216	0.0140641
4308	0.0124864	0.61019	0.141699	0.0382659	0.197358
4405	0.980813	0.0143022	0.000396446	0.00225979	0.00222835
4406	0.971394	0.00539361	0.000532168	0.00322603	0.0194541
4502	0.928031	0.0181829	0.0105787	0.00655105	0.036656
4503	0.947127	0.0186566	0.000423602	0.012433	0.0213601
4504	0.570586	0.017009	0.134461	0.268994	0.00895003
4601	0.977881	0.0189096	0.0028731	9.48211e-05	0.000241131
4602	0.857607	0.0253455	0.0185689	0.0389406	0.0595377
4701	0.143364	0.0702315	0.620527	0.147426	0.0184511
4702	0.78667	0.00378739	0.0109873	0.126919	0.0716366
4703	0.470783	0.100931	0.403245	0.024815	0.00022553
4704	0.226102	0.169994	0.158885	0.262279	0.18274
4705	0.995155	0.000832687	0.00248576	4.55664e-05	0.00148126
4805	0.809248	0.0565874	0.0891652	0.0117548	0.0332444
4806	0.895063	0.013029	0.0498325	0.00978771	0.0322874
4810	0.305625	0.470711	0.163212	0.0405355	0.0199166
5001	0.678636	0.233365	0.000442872	0.00137265	0.0861842
5003	0.540575	8.61799e-05	0.00399886	0.449511	0.00582907
5004	0.252193	0.202608	0.0326469	0.484465	0.0280877
5005	0.946319	0.0184106	0.00552169	0.0285352	0.00121339
5006	0.972685	0.00292504	0.000741893	0.0231772	0.000471186
5102	0.998743	6.67416e-06	0.00123764	4.92589e-06	7.79376e-06
5104	0.716681	0.00674783	0.00993736	0.244713	0.0219208
5105	0.266574	0.345964	0.000918796	0.213337	0.173206
5201	0.579044	0.0396256	0.00143385	0.287379	0.0925173
5301	0.918665	0.00494587	0.039604	0.0328056	0.0039791
5302	0.527696	0.363736	0.0659054	0.0318657	0.0107965
5303	0.412408	0.163474	0.00202871	0.0181	0.403989
5304	0.691618	0.0613049	0.136627	0.108496	0.00195399
5305	0.0916051	0.464561	0.217242	0.0817511	0.144841
5306	0.941063	0.02442	0.0122488	0.0159121	0.00635575
5309	0.96297	0.000475957	0.0186751	0.017095	0.00078408
5401	0.000406698	0.122094	0.737029	0.0601076	0.0803628
5403	0.994831	0.00163298	0.00107023	0.000622675	0.00184275
5406	0.345573	0.439759	6.65206e-05	0.00101173	0.21359
5407	0.791031	0.0522968	0.010091	0.0110837	0.135497
5408	0.770563	0.131588	0.00567576	0.0421498	0.0500234
5501	0.983329	0.0144483	6.87391e-05	0.000404554	0.00174902
5505	0.391134	0.255873	0.000234164	0.0783274	0.274432
5605	0.954196	3.94567e-05	7.10893e-05	0.00438175	0.0413118
5701	0.324349	0.389215	0.279066	0.00509044	0.00227944
5702	0.937366	0.000657581	0.0398714	0.021925	0.000180477
5704	0.969999	0.0050901	0.00258665	0.0185173	0.00380744
5705	0.256738	0.545842	0.0168396	0.0402127	0.140368
5709	0.0324602	0.839019	0.00118071	0.0556283	0.0717113
5806	0.233986	0.553227	0.00384795	0.140071	0.0688677
5808	0.978925	0.000436718	0.000737873	0.00274631	0.0171545
5810	0.792757	0.0168445	0.00832138	0.163032	0.0190455
5811	0.410954	0.247252	0.000203251	0.168639	0.172951
6004	0.943413	0.041408	0.0122178	2.3954e-05	0.00293751
6006	0.935349	0.0357119	0.000405645	0.0262047	0.00232837
6302	0.0706548	0.0181281	0.659145	0.208769	0.0433032
6303	0.855258	0.00280371	0.000490009	0.0121185	0.12933
6401	0.00614142	0.0523488	0.0315006	0.051611	0.858398
6403	0.222868	0.0031351	0.421563	0.307417	0.0450172
6404	0.884779	0.0029748	0.0537592	0.00123703	0.05725
6405	0.324186	0.216541	0.000710797	0.000983492	0.457579
6501	0.752918	0.171803	0.028169	0.00271999	0.0443899
6504	0.119452	0.214635	0.537785	0.12534	0.00278876
6506	0.895704	0.000447675	0.000706499	0.0266842	0.0764576
6507	0.722937	0.118293	0.00138853	0.100439	0.0569428
6508	0.990763	0.00700731	0.00169236	0.00036038	0.000177225
6601	0.992581	0.00057873	7.88104e-10	0.00676738	7.2735e-05
6603	0.798498	0.00137916	0.00210057	0.130248	0.0677747
6606	0.505868	0.39019	0.0503922	0.0170506	0.0365
6608	0.970539	0.00896626	0.00018299	0.0201204	0.000190941
6701	0.913916	0.0358295	0.0223713	0.0204933	0.0073897
6802	0.94176	0.00271329	4.84202e-05	0.00731923	0.0481591
7006	0.580532	0.315853	0.0164834	0.000103716	0.0870283
7013	0.975178	0.00229426	0.00726121	0.0134523	0.00181377
7101	0.990607	0.00153922	1.4362e-05	0.000754534	0.00708521
7102	0.910936	0.000313032	0.0132846	0.069489	0.00597743
7103	0.996341	0.00108767	0.000107893	8.62204e-05	0.00237691
7104	0.990649	0.000781504	0.000657423	0.003082	0.00483047
7201	0.964924	0.000825088	0.0015758	0.0324567	0.00021857
7203	0.239835	0.0174203	0.146402	0.450376	0.145966
7302	0.196086	0.492785	0.00440827	0.221319	0.0854021
7401	0.572436	0.231161	0.068123	0.00316851	0.125111
7403	0.950983	0.0125068	0.028917	0.0041139	0.00347969
7404	0.558381	0.180182	0.00972647	0.189324	0.0623872
7406	0.447414	0.00531703	0.0284108	0.047319	0.471539
7501	0.213487	0.0361554	0.00480347	0.0458359	0.699718
7502	0.753256	0.0188528	0.0442297	0.0805055	0.103156
7503	0.959992	0.00962685	0.00376557	0.0016766	0.0249386
7504	0.829561	0.01981	0.0447999	0.000467717	0.105361
7505	0.712088	0.0979492	6.12026e-05	0.0385233	0.151378
7507	0.788178	0.0812431	0.113635	0.00273071	0.0142135
7509	0.332942	0.344141	0.00459199	0.110903	0.207422
7603	0.957526	0.0179013	0.0209709	0.000735188	0.00286666
7604	0.890653	0.0394289	7.2219e-05	0.01093	0.0589159
7606	0.450961	0.345753	0.0107808	0.177543	0.0149622
7701	0.926811	0.00123386	0.0698302	0.00201852	0.000106472
7704	0.153993	0.0108212	0.828006	0.00672805	0.000452134
7707	0.000242236	0.215445	0.0164948	0.608491	0.159328
7803	0.966132	0.0196893	0.00486349	0.00921158	0.000103585
8003	0.058156	0.129153	0.684635	0.00925157	0.118805
8004	0.964932	9.26305e-05	0.0099508	0.0247676	0.000256896
8005	0.994799	0.00033324	1.38811e-05	0.000343456	0.00451019
8008	0.995302	0.000169549	0.000318878	0.000913443	0.00329662
8011	0.438886	0.0406384	0.493356	0.0251958	0.0019234
8012	0.00287457	0.017665	0.776333	0.178847	0.0242804
8103	0.454179	0.263901	0.111282	0.0137398	0.156898
8104	0.987508	0.0026516	3.93346e-05	0.00945156	0.000349075
8105	0.971613	4.21146e-06	0.000658299	0.000684645	0.0270396
8107	0.00503497	0.066892	0.106833	0.620251	0.200989
8108	0.829373	0.0196812	0.116318	0.0256275	0.00899982
8109	0.00675422	0.497169	0.00440784	0.00270633	0.488963
8110	0.897978	0.00508722	6.24483e-05	0.000659109	0.0962132
8112	0.824396	0.022911	0.00600563	0.0471694	0.0995184
8201	0.562199	0.00671112	0.0333788	0.34979	0.0479211
8203	0.898926	0.0012809	0.0979483	0.00151873	0.000326292
8205	0.927336	0.00656962	0.00459852	0.0137308	0.0477648
8301	0.893171	0.00416493	0.00752788	0.00921777	0.0859181
8302	0.885555	0.00222377	0.0569548	0.0516342	0.00363234
8303	0.974887	0.000467766	0.00190647	0.00018276	0.0225558
8401	0.939619	0.00671182	0.0223123	0.0297372	0.00162005
8403	0.938231	0.0207081	1.71184e-05	0.0356144	0.00542929
8405	0.99509	0.000978663	2.23915e-05	0.000994508	0.0029145
8406	0.943162	0.0200417	0.00474003	0.0160939	0.0159624
8501	0.206934	0.128781	0.24877	0.250165	0.16535
8502	0.963981	0.017313	0.00259699	0.0117681	0.00434051
8506	0.961042	0.0107023	0.000763395	0.00692622	0.0205658
8511	0.550699	0.107649	0.134389	0.116841	0.0904214
8601	0.568764	0.210635	0.111934	0.047196	0.0614717
8703	0.272729	0.0036403	0.475712	0.120086	0.127832
8707	0.477147	0.0441963	0.462712	0.000742788	0.0152015
8801	0.95566	0.0377393	0.0026069	0.00282868	0.0011656
8802	0.0651381	0.88459	3.36971e-07	0.0242071	0.026064
8804	0.428131	0.00617397	0.00567446	0.0615191	0.498501
9101	0.134322	0.203248	0.303235	0.359175	1.95518e-05
9102	0.083412	0.847787	0.0258605	0.00360627	0.0393341
9404	0.0939655	0.308314	0.551333	0.0198063	0.0265813
9505	0.184291	0.701335	0.00533641	0.0440707	0.0649674
